# Supplementary material
Source: Springer Nature journal article supplement (https://www.springermedizin.de/resource/supplementary/13276_2010_6_MOESM1_ESM.pdf/9676554)

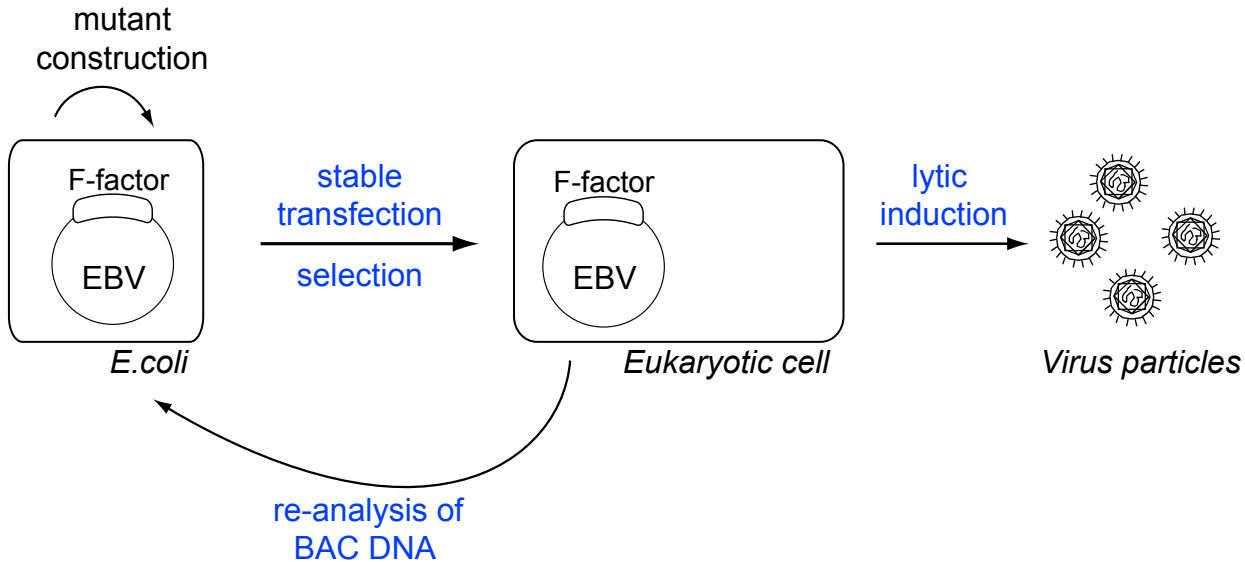

Supplement: MOESM1 [file 9676554]
